# Supplementary material
Source: Research Square preprint supplement (doi:10.21203/rs.3.rs-9174542/v1)
Supplement: Supplementary file 1 [file dd07a38c301df0a9e8047438.docx]

# **Supplementary Materials**

**Table S1.** Baseline prior knowledge and systems thinking preferences.

|  | **Full**  **(N= 48)** | | **Dull**  **(N = 46)** | | **Single**  **(N = 46)** | | **Kruskal-Wallis H** | |
| --- | --- | --- | --- | --- | --- | --- | --- | --- |
|  | ***M*** | ***SD*** | ***M*** | ***SD*** | ***M*** | ***SD*** | **χ2(2)** | ***p*** |
| **Evolution knowledge** | 14.48 | 3.60 | 14.43 | 3.46 | 13.09 | 3.66 | 5.63 | 0.060 |
|  |  |  |  |  |  |  | **One-way ANOVA** | |
|  | ***M*** | ***SD*** | ***M*** | ***SD*** | ***M*** | ***SD*** | ***F*** | ***p*** |
| **Systems thinking** | 54.03 | 21.02 | 56.36 | 21.59 | 56.54 | 20.38 | 0.105 | 0.900 |

**Table S2.** Kruskal–Wallis test of dyads’ systems thinking scores.

|  | **Full-level**  **(N = 24)** | | **Dual-level**  **(N=23)** | | **Single-level**  **(N=23)** | | **Kruskal-Wallis H test** | | |
| --- | --- | --- | --- | --- | --- | --- | --- | --- | --- |
| ***M*** | ***SD*** | ***M*** | ***SD*** | ***M*** | ***SD*** | **χ2(2)** | ***p*** | **η2** |
| **Total Score** | 24.33 | 8.51 | 17.52 | 4.07 | 14.96 | 6.44 | 16.99 | 0.0002 | 0.22 |

**Table S3** Post-hoc Mann–Whitney U test of systems thinking scores.

|  | **Mann–Whitney U** | **Z** | ***p*** | **Cohen’s *d*** |
| --- | --- | --- | --- | --- |
| Full vs. Dual | 420 | 3.06 | 0.0022 | 0.99 |
| Full vs. Single | 449.5 | 3.69 | 0.0002 | 1.28 |
| Dual vs. Single | 333.5 | 1.51 | 0.1307 | 0.46 |

**Table S4.** Kruskal–Wallis test of conceptual learning outcome.

|  | **Full-level**  **(N = 24)** | | **Dual-level (N=23)** | | **Single-level**  **(N=23)** | | **Kruskal-Wallis H test** | | |
| --- | --- | --- | --- | --- | --- | --- | --- | --- | --- |
|  | ***M*** | ***SD*** | ***M*** | ***SD*** | ***M*** | ***SD*** | **χ2(2)** | ***p*** | **η2** |
| **Total Score** | 72.79 | 25.71 | 52.67 | 21.54 | 47.83 | 21.65 | 14.88 | 0.0006 | 0.19 |

**Table S5.** Post-hoc Mann–Whitney U test of learning outcome.

|  | **Mann–Whitney U** | **Z** | ***p*** | **Cohen’s *d*** |
| --- | --- | --- | --- | --- |
| Full vs. Dual | 400.5 | 2.64 | 0.0083 | 0.84 |
| Full vs. Single | 449 | 3.67 | 0.0002 | 1.27 |
| Dual vs. Single | 319.5 | 1.12 | 0.2309 | 0.36 |

**Table S6.** One-way ANOVA of cognitive load.

|  | **Full Level**  **(N = 48)** | | **Dual Level**  **(N = 46)** | | **Single Level**  **(N=46)** | | **One-way ANOVA** | | |
| --- | --- | --- | --- | --- | --- | --- | --- | --- | --- |
|  | ***M*** | ***SD*** | ***M*** | ***SD*** | ***M*** | ***SD*** | ***F*** | ***p*** | ***η²*** |
| Intrinsic load | 7.06 | 1.63 | 6.63 | 1.68 | 5.98 | 1.72 | 5.00 | 0.008 | 0.05 |
| Extraneous load | 5.96 | 1.34 | 5.93 | 1.31 | 6.01 | 1.73 | 0.02 | 0.98 | 0.00 |
| Germane load | 8.16 | 1.11 | 8.21 | 1.45 | 8.15 | 1.27 | 0.04 | 0.96 | 0.00 |

**Table S7.** Post-hoc analysis of intrinsic cognitive load.

|  | ***t*** | **Bonferroni *p*** | **Holm *p*** | **Cohen’s *d*** |
| --- | --- | --- | --- | --- |
| Full vs. Dual | 1.17 | 0.73 | 0.24 | / |
| Full vs. Single | 3.13 | 0.006 | 0.006 | 0.65 |
| Dual vs. Single | 1.94 | 0.16 | 0.11 | / |

**Table S8**. Kruskal–Wallis test of simulation-based learning behavior.

|  | **Full Level**  **(N = 24)** | | **Dual Level**  **(N = 23)** | | **Single Level**  **(N= 23)** | | **Kruskal-Wallis H** | | |
| --- | --- | --- | --- | --- | --- | --- | --- | --- | --- |
|  | ***M*** | ***SD*** | ***M*** | ***SD*** | ***M*** | ***SD*** | **χ2(2)** | ***p*** | **η2** |
| Simulation runs | 11.71 | 3.22 | 16.35 | 5.67 | 17.78 | 5.53 | 19.95 | 0.0000 | 0.26 |
| Total comparison time (min) | 27.53 | 13.58 | 16.88 | 10.03 | 18.09 | 10.02 | 9.05 | 0.0108 | 0.11 |
| Average comparison time (min) | 2.98 | 1.45 | 1.59 | 0.81 | 1.44 | 0.96 | 20.08 | 0.0000 | 0.27 |

**Table S9.** Post-hoc Mann–Whitney U test of simulation runs, total comparison time and average comparison time.

| **Simulation runs** | **Mann–Whitney U** | **Z** | ***p*** | **Cohen’s *d*** |
| --- | --- | --- | --- | --- |
| Full vs Dual | 121 | -3.31 | 0.0009 | 1.09 |
| Full vs Single | 82 | -4.14 | 0.0000 | 1.51 |
| Dual vs Single | 223 | -0.90 | 0.3659 | 0.27 |
| **Total comparison time** |  |  |  |  |
| Full vs Dual | 406 | 2.76 | 0.0058 | 0.88 |
| Full vs Single | 388 | 2.37 | 0.0171 | 0.74 |
| Dual vs Single | 253 | -0.24 | 0.809 | 0.07 |
| **Average comparison time** |  |  |  |  |
| Full vs Dual | 437 | 3.42 | 0.0006 | 1.15 |
| Full vs Single | 469.5 | 4.11 | 0.0000 | 1.50 |
| Dual vs Single | 311.5 | 1.02 | 0.307 | 0.38 |

**Table S10.** One-way ANOVA of state occurrence rate.

|  | **Full Level**  **(N = 24)** | | **Dual Level**  **(N = 23)** | | **Single Level**  **(N = 23)** | | **One-way ANOVA** | | |
| --- | --- | --- | --- | --- | --- | --- | --- | --- | --- |
|  | ***M*** | ***SD*** | ***M*** | ***SD*** | ***M*** | ***SD*** | ***F*** | **adjusted *p*** | **η2** |
| State 1 | 0.20 | 0.05 | 0.19 | 0.05 | 0.20 | 0.04 | 0.33 | 0.722 | 0.01 |
| State 2 | 0.25 | 0.05 | 0.20 | 0.05 | 0.19 | 0.05 | 8.57 | 0.002 | 0.20 |
| State 3 | 0.32 | 0.04 | 0.34 | 0.06 | 0.35 | 0.07 | 1.48 | 0.315 | 0.04 |
| State 4 | 0.24 | 0.04 | 0.28 | 0.06 | 0.27 | 0.05 | 3.76 | 0.056 | 0.10 |

**Table S11**. Kruskal–Wallis H test of state transitions.

|  | **Full Level**  **(N = 24)** | | **Dual Level**  **(N = 23)** | | **Single Level**  **(N = 23)** | | **Kruskal-Wallis H** | | |
| --- | --- | --- | --- | --- | --- | --- | --- | --- | --- |
|  | ***M*** | ***SD*** | ***M*** | ***SD*** | ***M*** | ***SD*** | **χ2(2)** | **adjusted *p*** | **η2** |
| State 2→State 3 | 5.42 | 2.39 | 4.83 | 2.08 | 3.83 | 2.10 | 5.85 | 0.072 | 0.057 |
| State 3→State 2 | 5.71 | 2.53 | 5.00 | 2.50 | 3.61 | 1.88 | 9.09 | 0.043 | 0.106 |
| State 3→State 4 | 4.88 | 2.72 | 6.57 | 2.56 | 5.52 | 2.35 | 5.18 | 0.075 | 0.047 |
| State 4→State 3 | 4.79 | 2.41 | 6.78 | 2.83 | 5.39 | 2.31 | 7.19 | 0.055 | 0.077 |

**Table S12.** Assessment rubric for systems thinking measured by written explanations based on the Systems Thinking Hierarchy (STH).

| **Coding term** | **Score** | **Characteristics description (STH-Aligned)** | **Observable indicators in reasoning** | **Examples** |
| --- | --- | --- | --- | --- |
| **Dimension A: Structural/Hierarchical reasoning** (measuring the integration of concepts across system levels) | | | | |
| Within-level reasoning | 1 | STC1: Identification of system components and processes at a single level of organization, without relational or hierarchical integration | • Naming system elements or processes • Reasoning confined to one organizational level  • Descriptive rather than relational | *“Individuals that acquire more energy are more likely to survive and have a higher survival rate.”* |
| Cross-level reasoning | 2 | STC2: Structured organization of components and processes across two organizational levels; recognition of inter-level influence | • Linking two system levels  • Moving back and forth between levels  • Explaining how one level affects another | *“In a suitable and stable environment, with a moderate gene mutation rate, Dino individuals develop genetic mutations; Dinos better adapted to the environment survive.”* |
| Multi-level reasoning | 3 | STC1+2: Coordinated integration of components, processes, and relationships across more than three or more levels to explain system-wide behavior | • Using evidence from multiple levels  • Explaining system-level outcomes  • Demonstrating coherent hierarchical organization  • Explicit reference to three or more organizational levels | *“Genetic mutations have a certain degree of randomness, with a certain probability of mutating genes that are beneficial to Dino survival. When the population base increases, the probability of beneficial mutations for Dino survival also increases.”* |
| **Dimension B: Dynamic/Mechanistic** **reasoning**  (assessing the understanding of causal, temporal, and emergent system behaviors) | | | | |
| Sequential causal reasoning | 1 | STC3: Recognition of simple, one-directional relationships between system components organized as a sequential process | • Stepwise causal chains  • No feedback or temporal branching  • Assuming proportional cause–effect relations | *“All other conditions being equal, the larger the population size, the better the overall adaptability of the Dinos, and the higher their survival rate.”* |
| Emergent pattern reasoning | 2 | STC6: Understanding patterns and emergence; recognition that system outcomes are not proportional to inputs | • Mentioning thresholds, probabilities, or tipping points  • Explaining disproportionate effects  • Identifying emergent system behavior | *“When the gene mutation probability is at a certain value, it is most favorable for Dino evolution. The larger the population size, the faster the rate of evolution; the longer the evolutionary generations, the higher the degree of evolution.”* |
| Feedback loop reasoning | 3 | STC4: Understanding dynamic system relationships and STC5: the cyclic nature of systems through reinforcing or balancing feedback loops. | • Identifying cyclic causation regardless of time scale • Describing reinforcement or regulation  • Explaining system self-amplification or stabilization | *“Excessively frequent genetic mutations make it difficult for beneficial mutations to be retained, leading to an unstable direction of evolution.”* |
| Temporal analysis | 3 | STC7: Application of temporal analysis by evaluating historical system behavior and projecting future system trajectories | • Referencing generational or historical change  • Distinguishing short- vs. long-term effects  • Making predictions | *“As generations increase, the probability of beneficial genes appearing also increases. Individuals exhibiting genes favorable for survival have higher survival rates, thereby increasing their probability of acquiring and obtaining sufficient energy to reproduce offspring.”* |
| Hidden-dimension reasoning | 3 | STC8: Perception of hidden dimensions and latent structures underlying system behavior; system generalization beyond observable variables | • Identifying implicit mechanisms  • Integrating genetic, ecological, and temporal dimensions  • Demonstrating abstract system-level understanding | *“Genetic mutations enrich the population's gene pool, and natural selection filters out traits favorable for survival. These heritable characteristics are preserved through reproduction, causing beneficial gene frequencies to increase and detrimental gene frequencies to decrease, thereby enhancing overall adaptability and survival rate.”* |

**Table S13. Proposition coding sheet for evaluating conceptual understanding in self-constructed concept map**

| **Dimensions** | **Description** | **Example** |
| --- | --- | --- |
| Relevance or importance | Relevance of a proposition to the cause-and-effect analysis of the Evolution Phenomena:  0 = irrelevant; 0.5 = somewhat relevant; 1 = relevant; 2 = highly relevant or particularly important. | *Number of reward genes → affects (more rewards, fewer penalty, increases energy) → average energy* (Variation in the number of reward genes directly influences the feedback dynamics that govern the accumulation and flow of genetic information within the population’s gene pool. Weight = 2) |
| Content correctness | Whether the proposition is correct: 0 = totally incorrect; 1 = partially correct; 2 = absolutely correct | *Gene mutation rate → High → Population survival rate rapidly increases to threshold* (Mutation rate and survival are not linearly related. A high mutation rate often leads to an accumulation of deleterious mutations, reducing overall fitness and survival. Correctness = 0, totally incorrect) |





**Fig. S1.** **Baseline result of evolution knowledge and systems thinking ability.** **a,** Evolution knowledge scores across experimental groups. **b,** Systems-thinking ability across experimental groups. Both measures showed adequate internal consistency in this sample. No significant between-group differences were observed at baseline, confirming comparability between groups prior to the intervention. Error bars denote standard error of the mean; n.s., not significant.





**Fig. S2.** **Screenshot of the EvoViz multilevel modeling platform.** The platform is a simulation tool designed to explore the evolution of the foraging ability of the digital species, Dino. The top-left panel allows users to set variable parameters that influence evolution and select different visualization outputs. The top-right panel displays the simulation results, the bottom-left panel shows the optimal foraging path of Dino, and the bottom-right panel presents the genetic profile of the best-performing foraging Dino. The platform visualizes dynamic system behavior across genetic (micro), individual (meso), and population (macro) levels, highlighting their interactions over time. Random genetic mutations produce both beneficial and deleterious alleles, leading to observable phenotypic variation at the individual level. Through natural selection, advantageous traits are preferentially retained, gradually reshaping the population’s gene pool and producing emergent evolutionary patterns. EvoViz enables learners to manipulate parameters and observe how micro-level variability cascades into meso-level behavioral adaptations and macro-level population dynamics.





**Fig. S3** **Dynamic interbrain synchrony (dIBS) analysis and occurrence rates of dIBS states.** **a,** IBS matrices for each dyad were segmented using a sliding-window approach (window length = 48 s, step size = 1 s) and clustered with k-means to identify four representative dIBS states. **b,** Occurrence rates of each dIBS state across the three experimental groups (Full-level, Dual-level, and Single-level).
